# Supplementary material for: Evaluation of OPEN Zinc Finger Nucleases for Direct Gene Targeting of the ROSA26 Locus in Mouse Embryos
Source: PubMed Central journal article supplement (PMC3435328; doi:10.1371/journal.pone.0041796), 2012-09-06
Supplement: pone.0041796.s003.pdf [file pone.0041796.s003.pdf]

| Gene | ZFN Name | Site Sequence                       |
|------|----------|-------------------------------------|
| R26  | 91       | cTGCTGCCTCctggct <b>TCTGAGGAC</b> c |
|      | 90       | g <b>ACGACGGAG</b> gaccgaAGACTCCTGg |
| R26  | 204      | gCGCCCTGCgcaac <b>GTGGCAGGA</b> a   |
|      | 205      | c <b>GCGGGACG</b> cgttgCACCGTCCTt   |
