# Supplementary material for: Evaluation of OPEN Zinc Finger Nucleases for Direct Gene Targeting of the ROSA26 Locus in Mouse Embryos
Source: PubMed Central journal article supplement (PMC3435328; doi:10.1371/journal.pone.0041796), 2012-09-06
Supplement: pone.0041796.s004.pdf [file pone.0041796.s004.pdf]

>ZFN90

TCTAGACCCGGGGAGCGCCCCTTCCAGTGTGCGCATTTGCATGCGGAACTTTTCGAGCATGGAGCAGCTTGCCAGGCATACCCGTACTCATAC  
CGGTGAAAAACCGTTTCAGTGTGCGGATCTGTATGCGAAATTTCTCCCAGACGGAGACGTTGAAGAGGCATCTACGTACGCACACCGGCGAG  
AAGCCATTCCAATGCCGAATATGCATGCGCAACTTCAGTGTGCGCGGACAACTGCGCAGGCACCTAAAAACCCACCTGAGGGGATCC

>ZFN91

TCTAGACCCGGGGAGCGCCCCTTCCAGTGTGCGCATTTGCATGCGGAACTTTTCGGACGAGGCGAACCTTAGGCGCCATACCCGTACTCATAC  
CGGTGAAAAACCGTTTCAGTGTGCGGATCTGTATGCGAAATTTCTCCCAGCGCGGACAACCTTGGGCAGGCATCTACGTACGCACACCGGCGAG  
AAGCCATTCCAATGCCGAATATGCATGCGCAACTTCAGTGTGCGGGAACACGCTGAAGGGCCACCTAAAAACCCACCTGAGGGGATCC

>ZFN204

TCTAGACCCGGGGAGCGCCCCTTCCAGTGTGCGCATTTGCATGCGGAACTTTTCGGACAACGCCACCTTGCGCGCCATACCCGTACTCATAC  
CGGTGAAAAACCGTTTCAGTGTGCGGATCTGTATGCGAAATTTCTCCCAGACCGAGACCTTGAAGAGGCATCTACGTACGCACACCGGCGAGA  
AGCCATTCCAATGCCGAATATGCATGCGCAACTTCAGTAGGCCCGACGCCCTGACCCGCCACCTAAAAACCCACCTGAGGGGATCC

>ZFN205

TCTAGACCCGGGGAGCGCCCCTTCCAGTGTGCGCATTTGCATGCGGAACTTTTCGAAGCGCCACACGCTTACCCGCCATACCCGTACTCATAC  
CGGTGAAAAACCGTTTCAGTGTGCGGATCTGTATGCGAAATTTCTCCCAGCGCGAGCACTTGGTGCGCCATCTACGTACGCACACCGGCGAGA  
AGCCATTCCAATGCCGAATATGCATGCGCAACTTCAGTCAGACGGCCACCCTGAAGCGGCACCTAAAAACCCACCTGAGGGGATCC
